# Supplementary material
Source: PubMed Central journal article supplement (PMC6208359)
Supplement: NIHMS952577-supplement-supplement_1.pdf [file NIHMS952577-supplement-supplement_1.pdf]

## Online Appendix

### A.1 Supplementary Analyses for Children Born 1983 to 1986

In supplemental analyses, I estimated models using separate self-regulation problems and social problems subscales. Patterns of results were similar to those presented in the main text. Consistent with most psycho-biologists' notion of self-regulation (see Blair and Diamond 2008), the self-regulation problems subscale includes a measure of concentration that is excluded from the overall externalizing problems scale: "How frequently does your child have difficulty concentrating?" (This item is excluded from the overall externalizing problems scale to preserve comparability to other externalizing problems scales, which do not typically include concentration [Duncan et al. 2007; Peterson and Zill 1986]).

Although the patterns of associations between both subscales and years of schooling were similar to those of the overall externalizing problems scale, early self-regulation problems are ultimately stronger drivers of educational attainment than are social problems. This finding is consistent with work by Duncan and colleagues (2007), which finds that attention skills (closely related to self-regulation skills) are the behaviors most strongly correlated with adult educational attainment. Specifically, in my analysis of gender differences in the associations among NLSY-C children born 1983 to 1986, I find that the magnitude of the relationship between early self-regulation problems and years of schooling among boys was nearly 40 percent larger than that between social problems and years of schooling among boys. Additionally, the gender difference in the magnitudes of the association was roughly 5 times larger for self-regulation problems than for social problems. This was largely because higher self-regulation problems were associated with a larger decrease in years of schooling among boys than higher social problems (described above). But, it was also because higher self-regulation problems were not associated with as large of a decline in years of schooling among girls compared to higher social problems. Each unit increase in self-regulation problems was associated with a .075 years decrease in schooling among girls, whereas each unit increase in social problems was associated with a .082 years decrease in schooling, net of early childhood factors and demographic controls.

I also used supplemental analyses to address features of the model design, to see if one could include early behaviors or key mediators at three or more developmental stages. Measures like externalizing behaviors, PPVT, school/peer and home context, and school performance were collected at additional time points beyond those at which they are modeled. In this study, my focus is documenting gender patterns rather than comprehensively documenting precise magnitudes of correlation of behaviors across all developmental stages. However, I did encounter issues of power and multicollinearity when attempting to estimate a path model with more than two measures of early behaviors and mediators like home or school context. Given the current model's complexity, I was only able to include measures at one or two of the key developmental stages at which their importance has been highlighted in recent research.

I conducted a third set of supplemental analyses as part of the treatment of missing data. Imputed predictor variables with high missingness included parental conflict (missing for 35 percent of cases), childhood behaviors (18 percent missing, almost all were also missing on educational attainment), household income at age 4 (16 percent), and home environment at ages 10 to 11 (12 percent). Given the extent of item missingness due largely to sample attrition, sensitivity analyses investigated whether the treatment of missing data introduced bias into parameter estimates: (1) replication with complete cases only; (2) replication with a second set of 20 imputed datasets in which the variances of imputed items were increased by 10 percent to test whether introducing noise in the multiple imputation procedure would significantly weaken associations of interest (Royston 2004), and (3) assessment of systematic biases in item-missingness by regressing a binary indicator for missingness on the dependent variable on observed covariates. This tests whether the dependent variable is missing-at-random as a function of observed predictors. Substantive results did not change. Sample attrition by age 26 to 29 was slightly higher among children with higher PPVT scores at age 3 to 4 and who were low birth weight, and was slightly lower among children who were cared for outside the home at age 3 to 4.

Finally, because it is common for children in the United States to enter kindergarten at age 5—the earliest point at which behavior problems were measured for roughly half of the sample in this study (i.e., the 1983 and 1985 birth cohorts)—I restricted analyses to children born in 1984 and 1986 for whom behaviors at age 4 are available. Substantive results did not change. In addition, I compared patterns of gender differences for the NLSY-C children with age 5 behavior assessments to NLSY-C children whose behavior problems were assessed at age 4, as well as to children in the nationally representative sample of children in the Early Childhood Longitudinal Study-Birth Cohort (ECLS-B) observed at age 4. Patterns were overwhelmingly similar across ages and samples, indicating that exposure to school contexts for the children assessed at age 5 did not influence mean gender differences compared to children measured at age 4 prior to kindergarten entry. This points to persistent patterns of gender difference over the 15 years between the mid-1980s and the late 1990s.

## **A.2 Supplementary Analyses for Children Born 1983 to 1993 to Include Children Born to Older Mothers**

In supplementary analyses addressing generalizability of results to older mothers at birth, who tend to be from higher-SES backgrounds, I replicated the decomposition but pooling children born 1983 to 1993 to mothers age 18 to 35 years at birth (rather than 18 to 29 years). Table A2.1 shows results for the subset of 1983 to 1993 cohorts born to a wider SES range of mothers (those who were age 18 to 35 at birth). Because the youngest children (those born in 1993) are only 19 by 2012, here I decompose schooling completed by ages 19 to 22 across all 1983 to 1993 birth cohorts. This can be thought of as capturing

nearly on-time high school completion and potential college enrollment.

When including children born to older (and higher-SES) mothers, the gender gap in schooling is smaller (.54 years versus .75 years) than among the subset of 1983 to 1986 cohorts who were born to younger mothers of lower-SES backgrounds (see Appendix Table A2.1 versus Table 3 of the main text). Both boys' and girls' mean externalizing problems scores are lower (row 2, columns 1 to 3 of Table A2.1). In addition, boys experience a buffer with respect to the effect of early externalizing problems on their early adult attainment (columns 4 and 5).

Interestingly, when looking at relatively on-time high school completion and college enrollment among girls ages 19 to 22, there is a larger, negative effect of early externalizing problems, despite the inclusion of children born to older mothers (presumably also from higher-SES backgrounds). Based on a supplementary decomposition of schooling completed by ages 19 to 22 among the 1983 to 1986 cohorts (not shown), I speculate that this reflects a broader pattern in which the effects of early externalizing are similar for girls and boys when considering relatively on-time high school completion and college enrollment by age 19 to 22 (rather than 26 to 29). However, to more directly distinguish effects of maternal age at birth from those of family SES, future work should directly model variation by mother's education or household income rather than assuming mother's age at birth is a direct proxy for social class.

When including children born to mothers up through age 35 at birth, many from higher-SES backgrounds, early externalizing problems account for a much smaller share of the gender gap in on-time high school completion and college enrollment by age 19 to 22. Early externalizing problems account for 15.9 percent of the .54 years gap, or 3.9 percent of observed gap-widening early childhood and demographic factors. Boys' higher levels of early externalizing problems contribute to the gap in high school completion and college enrollment by age 19 to 22. Only 30 percent of the gap (.026 of the .086 years contributed by early externalizing problems) is due to the larger negative effect of early externalizing problems on boys' schooling. Roughly 70 percent (.60 of the .086 years) is due to boys' higher levels of early externalizing problems.

In supplementary analyses not shown, I also fit logit models examining high school completion by age 22 as a binary outcome. Although the association between early externalizing problems and high school completion is statistically significant when examining boys born to younger mothers and older mothers together, the magnitude is only roughly one-third as large. Including children born to older mothers, many from higher-income families, the gender difference in the association is only one-tenth as large (a difference between boys and girls of roughly 18 percentage points when including older mothers versus roughly 2 percentage points when examining only children born to younger mothers).

Online Appendix Table A1.1: Detailed Results for Two-Way Decomposition of Gender Differences in Levels and Effects of Externalizing Problems and Family Factors on Years of Schooling at Ages 26 to 29 for NLSY-C Children Born 1983 to 1986 (Reference: Boys)

|                                                                                                                                                                    | Means  |        | Means Diff |        | OLS Regression Coefficients |        | Contribution of Diff in Levels | Contribution of Diff in Coefficients | Contribution of Diff in Levels & Coefficients | Prop. of Positive Effects on Gap | Prop. of Negative Effects on Gap |       |     |     |      |
|--------------------------------------------------------------------------------------------------------------------------------------------------------------------|--------|--------|------------|--------|-----------------------------|--------|--------------------------------|--------------------------------------|-----------------------------------------------|----------------------------------|----------------------------------|-------|-----|-----|------|
|                                                                                                                                                                    | (1)    | (2)    | (3)        | (4)    | (5)                         | (6)    |                                |                                      |                                               |                                  |                                  | (7)   | (8) | (9) | (10) |
|                                                                                                                                                                    | F      | M      | F-M        | F      | Sig                         | M      |                                |                                      |                                               |                                  |                                  | Sig   |     |     |      |
| Mother Years of Schooling at Birth                                                                                                                                 | 12.139 | 12.088 | 0.051      | 0.353  | ***                         | 0.298  | ***                            | 0.015                                | 0.665                                         | 0.680                            | 0.248                            | 0.000 |     |     |      |
| Externalizing Problems, Ages 4-5                                                                                                                                   | 1.971  | 2.603  | -0.632     | -0.038 |                             | -0.169 | ***                            | 0.107                                | 0.341                                         | 0.448                            | 0.163                            | 0.000 |     |     |      |
| Birth Order                                                                                                                                                        | 1.784  | 1.791  | -0.007     | -0.235 |                             | -0.442 | **                             | 0.003                                | 0.371                                         | 0.374                            | 0.136                            | 0.000 |     |     |      |
| African-American                                                                                                                                                   | 0.179  | 0.154  | 0.026      | 0.690  | **                          | 0.008  |                                | 0.000                                | 0.105                                         | 0.105                            | 0.038                            | 0.000 |     |     |      |
| Received Care Outside Home, Ages 4-5                                                                                                                               | 0.542  | 0.521  | 0.021      | 0.141  |                             | -0.006 |                                | 0.000                                | 0.077                                         | 0.076                            | 0.028                            | 0.000 |     |     |      |
| Low Birth Weight                                                                                                                                                   | 0.068  | 0.050  | 0.018      | 0.500  |                             | -0.142 |                                | -0.003                               | 0.032                                         | 0.030                            | 0.011                            | 0.000 |     |     |      |
| Child Std. Score on PPVT, Ages 3-4                                                                                                                                 | 0.247  | 0.185  | 0.062      | 0.414  | ***                         | 0.437  | ***                            | 0.027                                | -0.004                                        | 0.023                            | 0.008                            | 0.000 |     |     |      |
| Home Environment, Ages 3-5                                                                                                                                         | -0.055 | -0.031 | -0.025     | -0.693 | *                           | -0.058 |                                | 0.001                                | 0.019                                         | 0.021                            | 0.008                            | 0.000 |     |     |      |
| Hispanic                                                                                                                                                           | 0.075  | 0.081  | -0.006     | 0.249  |                             | 0.088  |                                | -0.001                               | 0.013                                         | 0.012                            | 0.005                            | 0.000 |     |     |      |
| Mother Age at Birth                                                                                                                                                | 23.820 | 23.865 | -0.045     | 0.085  |                             | 0.156  | *                              | -0.007                               | -1.694                                        | -1.702                           | 0.000                            | 0.855 |     |     |      |
| Number of Children in Family, Ages 4-5                                                                                                                             | 2.218  | 2.255  | -0.037     | 0.162  |                             | 0.232  |                                | -0.009                               | -0.158                                        | -0.166                           | 0.000                            | 0.084 |     |     |      |
| Father Absent at Child's Birth                                                                                                                                     | 0.193  | 0.179  | 0.014      | -0.792 | **                          | -0.219 |                                | -0.003                               | -0.103                                        | -0.106                           | 0.000                            | 0.053 |     |     |      |
| Household Income in \$2011 (/\$10,000), Child Ages 4-5                                                                                                             | 7.288  | 6.028  | 1.260      | 0.010  | *                           | 0.016  |                                | 0.020                                | -0.036                                        | -0.016                           | 0.000                            | 0.008 |     |     |      |
| Constant                                                                                                                                                           | 1.000  | 1.000  | 0.000      | 7.170  | ***                         | 6.196  | ***                            | 0.000                                | 0.974                                         | 0.974                            | 0.355                            | 0.000 |     |     |      |
| Observations (N)                                                                                                                                                   | 881    | 780    |            | 881    |                             | 780    |                                |                                      |                                               |                                  |                                  |       |     |     |      |
| Overall Contribution of Early Externalizing Problems, Early Childhood Factors, and Controls to the Gender Gap in Years of Schooling                                |        |        |            |        |                             |        | 0.152                          | 0.601                                | 0.754                                         | 1.000                            | 1.000                            |       |     |     |      |
| Overall Contribution of Early Externalizing Problems, Early Childhood Factors, and Controls to the Gender Gap as a Proportion of Gap Driven by Levels vs. Effects: |        |        |            |        |                             |        | 0.202                          | 0.798                                | 1.000                                         |                                  |                                  |       |     |     |      |

\*\*\* p<0.001, \*\*p<0.01, \* p<0.05, + p<0.10 (two-tailed t-tests for a statistically significant difference from 0). This model uses boys' coefficients as the reference when calculating each variable's contribution to the gap in schooling due to gender differences in mean levels and boys' means as the reference when calculating each variable's contribution due to gender differences in coefficients (i.e., effects).

Source: The 1983 to 1986 birth cohorts of the Children of the National Longitudinal Survey of Youth:1979 (NLSY-C; <https://www.nlsinfo.org/content/cohorts/nlsy79-children>) and matched National Longitudinal Survey of Youth:1979 (mother sample). The low-income white and military oversamples are excluded.

Note: The National Longitudinal Survey of Youth-Child Supplement (NLSY-C) consists of a nationally representative sample of children born to women age 14 to 21 in 1979; after excluding the poor white and military oversamples, the working sample in this study is restricted to the 1,857 children born 1983 to 1986, whose mothers were 18 to 29 years at birth. Children born 1983 to 1986 were born early enough to be age 26 to 29 as of the 2012 follow-up survey, but late enough to have early behavior problems information measured at age 4 to 5 beginning in 1986, at which point these items were introduced for children age 4 to 16. I used multiple imputation of 20 datasets to handle item-missingness. Model estimates use inverse-probability weighting to deal with stratified sample design (minority oversampling) and sample attrition by the 2012 follow-up wave (weights are described at: <https://www.nlsinfo.org/weights/nlsy79>). Once inverse-probability survey weights are applied, the working sample with complete attainment and behavior information drops from 1,857 to 1,661 children (881 girls, 780 boys).

Online Appendix Table A1.2: Detailed Results for Two-Way Decomposition of Gender Differences in Levels and Effects of Externalizing Problems and Family Factors on Years of Schooling at Ages 26 to 29 for NLSY-C Children Born 1983 to 1986 (Reference: Girls)

|                                                                                                                                                                    | Means  |        | Means Diff |        | OLS Regression Coefficients |        | Contribution of Diff. in Levels |        | Contribution of Diff. in Coefficients |        | Total Contribution of Levels & Coefficients | Prop. of Positive Effects on Gap | Prop. of Negative Effects on Gap |
|--------------------------------------------------------------------------------------------------------------------------------------------------------------------|--------|--------|------------|--------|-----------------------------|--------|---------------------------------|--------|---------------------------------------|--------|---------------------------------------------|----------------------------------|----------------------------------|
|                                                                                                                                                                    | (1)    | (2)    | (3)        | (4)    | (5)                         | (5)    | (6)                             | (7)    | (8)                                   | (8)    | (9)                                         | (10)                             |                                  |
|                                                                                                                                                                    | F      | M      | M-F        | F      | M                           | Sig    |                                 |        |                                       |        |                                             |                                  |                                  |
| Mother Years of Schooling at Birth                                                                                                                                 | 12.139 | 12.088 | -0.051     | 0.353  | ***                         | 0.298  | ***                             | 0.018  | 0.668                                 | 0.686  | 0.257                                       | 0.000                            |                                  |
| Birth Order                                                                                                                                                        | 1.784  | 1.791  | 0.007      | -0.235 |                             | -0.442 | **                              | 0.002  | 0.369                                 | 0.371  | 0.139                                       | 0.000                            |                                  |
| Externalizing Problems, Ages 4-5                                                                                                                                   | 1.971  | 2.603  | 0.632      | -0.038 |                             | -0.169 | ***                             | 0.024  | 0.258                                 | 0.282  | 0.106                                       | 0.000                            |                                  |
| African-American                                                                                                                                                   | 0.179  | 0.154  | -0.026     | 0.690  | **                          | 0.008  |                                 | 0.018  | 0.122                                 | 0.140  | 0.052                                       | 0.000                            |                                  |
| Received Care Outside Home, Ages 4-5                                                                                                                               | 0.542  | 0.521  | -0.021     | 0.141  |                             | -0.006 |                                 | 0.003  | 0.080                                 | 0.083  | 0.031                                       | 0.000                            |                                  |
| Low Birth Weight                                                                                                                                                   | 0.068  | 0.050  | -0.018     | 0.500  |                             | -0.142 |                                 | 0.009  | 0.044                                 | 0.053  | 0.020                                       | 0.000                            |                                  |
| Home Environment, Ages 3-5                                                                                                                                         | -0.055 | -0.031 | 0.025      | -0.693 | *                           | -0.058 |                                 | 0.017  | 0.035                                 | 0.052  | 0.020                                       | 0.000                            |                                  |
| Child Std. Score on PPVT, Ages 3-4                                                                                                                                 | 0.247  | 0.185  | -0.062     | 0.414  | ***                         | 0.437  | ***                             | 0.026  | -0.006                                | 0.020  | 0.007                                       | 0.000                            |                                  |
| Hispanic                                                                                                                                                           | 0.075  | 0.081  | 0.006      | 0.249  |                             | 0.088  |                                 | -0.002 | 0.012                                 | 0.010  | 0.004                                       | 0.000                            |                                  |
| Household Income in \$2011 (/ \$10,000), Child Ages 4-5                                                                                                            | 7.288  | 6.028  | -1.260     | 0.010  | *                           | 0.016  |                                 | 0.013  | -0.044                                | -0.031 | 0.000                                       | 0.015                            |                                  |
| Mother Age at Birth                                                                                                                                                | 23.820 | 23.865 | 0.045      | 0.085  |                             | 0.156  | *                               | -0.004 | -1.691                                | -1.695 | 0.000                                       | 0.844                            |                                  |
| Number of Children in Family, Ages 4-5                                                                                                                             | 2.218  | 2.255  | 0.037      | 0.162  |                             | 0.232  |                                 | -0.006 | -0.155                                | -0.161 | 0.000                                       | 0.080                            |                                  |
| Father Absent at Child's Birth                                                                                                                                     | 0.193  | 0.179  | -0.014     | -0.792 | **                          | -0.219 |                                 | -0.011 | -0.110                                | -0.121 | 0.000                                       | 0.060                            |                                  |
| Constant                                                                                                                                                           | 1.000  | 1.000  | 0.000      | 7.170  | ***                         | 6.196  | ***                             | 0.000  | 0.974                                 | 0.974  | 0.365                                       | 0.000                            |                                  |
| Observations (N)                                                                                                                                                   | 881    | 780    |            | 881    |                             | 780    |                                 |        |                                       |        |                                             |                                  |                                  |
| Overall Contribution of Early Externalizing Problems, Early Childhood Factors, and Controls to the Gender Gap in Years of Schooling:                               |        |        |            |        |                             |        |                                 | 0.106  | 0.556                                 | 0.662  | 1.000                                       | 1.000                            |                                  |
| Overall Contribution of Early Externalizing Problems, Early Childhood Factors, and Controls to the Gender Gap as a Proportion of Gap Driven by Levels vs. Effects: |        |        |            |        |                             |        |                                 | 0.161  | 0.839                                 | 1.000  |                                             |                                  |                                  |

\*\*\* p<0.001, \*\*p<0.01, \* p<0.05, + p<0.10 (two-tailed t-tests for a statistically significant difference from 0). This model uses girls' coefficients as the reference when calculating each variable's contribution to the gap in schooling due to gender differences in mean levels and girls' means as the reference when calculating each variable's contribution due to gender differences in coefficients (i.e., effects).

Source: The 1983 to 1986 birth cohorts of the Children of the National Longitudinal Survey of Youth:1979 (NLSY-C; <https://www.nlsinfo.org/content/cohorts/nlsy79-children>) and matched National Longitudinal Survey of Youth:1979 (mother sample). The low-income white and military oversamples are excluded.

Note: The National Longitudinal Survey of Youth-Child Supplement (NLSY-C) consists of a nationally representative sample of children born to women age 14 to 21 in 1979; after excluding the poor white and military oversamples, the working sample in this study is restricted to the 1,857 children born 1983 to 1986, whose mothers were 18 to 29 years at birth. Children born 1983 to 1986 were born early enough to be age 26 to 29 as of the 2012 follow-up survey, but late enough to have early behavior problems information measured at age 4 to 5 beginning in 1986, at which point these items were introduced for children age 4 to 16. I used multiple imputation of 20 datasets to handle item-missingness. Model estimates use inverse-probability weighting to deal with stratified sample design (minority oversampling) and sample attrition by the 2012 follow-up wave (weights are described at: <https://www.nlsinfo.org/weights/nlsy79>). Once inverse-probability survey weights are applied, the working sample with complete attainment and behavior information drops from 1,857 to 1,661 children (881 girls, 780 boys).

Online Appendix Table A1.3: Detailed Results from Path Analysis of Indirect Pathways between Externalizing Problems at Ages 4 to 5 and Years of Schooling among NLSY-C Children Born 1983 to 1986, by Gender

|                                                                                                                                                     | Males (N=780) |          |          |                       | Females (N=881) |         |          |                       |       |         |       |
|-----------------------------------------------------------------------------------------------------------------------------------------------------|---------------|----------|----------|-----------------------|-----------------|---------|----------|-----------------------|-------|---------|-------|
|                                                                                                                                                     | $\beta$       | SE       | T--Value | P--Value <sup>1</sup> | $\beta$         | SE      | T--Value | P--Value <sup>1</sup> |       |         |       |
| Total <sup>1</sup>                                                                                                                                  | --0.110       | 0.045    | --2.427  | 0.015                 | --0.066         | 0.048   | --1.380  | 0.168                 |       |         |       |
| Total Indirect (Extern-->X'-->HGC)                                                                                                                  | --0.129       | 0.028    | --4.567  | 0.000                 | --0.101         | 0.029   | --3.542  | 0.000                 |       |         |       |
| <i>X' (Vector of Specific Indirect Pathways: A, B, C, D)</i>                                                                                        |               |          |          |                       |                 |         |          |                       |       |         |       |
| <i>First-Order Indirect Path (A) between Externalizing Problems at Ages 4 to 5 and Years of Schooling (i.e., Highest Grade Completed)</i>           |               |          |          |                       |                 |         |          |                       |       |         |       |
| <u>A</u>                                                                                                                                            | <u>B</u>      | <u>C</u> | <u>D</u> |                       |                 |         |          |                       |       |         |       |
| READP68                                                                                                                                             |               |          |          | --0.001               | 0.007           | --0.144 | 0.885    | 0.001                 | 0.004 | 0.275   | 0.784 |
| MATHP68                                                                                                                                             |               |          |          | --0.004               | 0.007           | --0.594 | 0.552    | --0.001               | 0.003 | --0.421 | 0.674 |
| EXPECT14                                                                                                                                            |               |          |          | 0.003                 | 0.004           | 0.907   | 0.364    | 0.004                 | 0.006 | 0.733   | 0.464 |
| PEER1012                                                                                                                                            |               |          |          | --0.004               | 0.004           | --0.969 | 0.333    | --0.003               | 0.003 | --0.899 | 0.369 |
| EXTERN12                                                                                                                                            |               |          |          | --0.051               | 0.018           | --2.831 | 0.005    | --0.065               | 0.018 | --3.621 | 0.000 |
| READP12                                                                                                                                             |               |          |          | --0.007               | 0.005           | --1.291 | 0.197    | --0.003               | 0.004 | --0.817 | 0.414 |
| MATHP12                                                                                                                                             |               |          |          | --0.011               | 0.007           | --1.460 | 0.144    | --0.002               | 0.007 | --0.292 | 0.770 |
| EFFORT12                                                                                                                                            |               |          |          | 0.003                 | 0.003           | 0.796   | 0.426    | --0.004               | 0.004 | --1.008 | 0.313 |
| REPGR1417                                                                                                                                           |               |          |          | --0.012               | 0.013           | --0.884 | 0.377    | 0.001                 | 0.012 | 0.068   | 0.946 |
| <i>Second-Order Indirect Paths (A &amp; B) between Externalizing Problems at Ages 4 to 5 and Years of Schooling (i.e., Highest Grade Completed)</i> |               |          |          |                       |                 |         |          |                       |       |         |       |
| <u>A</u>                                                                                                                                            | <u>B</u>      | <u>C</u> | <u>D</u> |                       |                 |         |          |                       |       |         |       |
| READP68                                                                                                                                             | EXPECT14      |          |          | 0.000                 | 0.001           | --0.660 | 0.509    | 0.000                 | 0.000 | --0.111 | 0.911 |
| MATHP68                                                                                                                                             | EXPECT14      |          |          | --0.002               | 0.001           | --1.424 | 0.154    | --0.001               | 0.001 | --1.085 | 0.278 |
| PEER1012                                                                                                                                            | EXPECT14      |          |          | 0.000                 | 0.000           | --0.513 | 0.608    | 0.000                 | 0.000 | 0.739   | 0.460 |
| EXTERN12                                                                                                                                            | EXPECT14      |          |          | --0.005               | 0.003           | --1.681 | 0.093    | --0.006               | 0.003 | --2.110 | 0.035 |
| READP12                                                                                                                                             | EXPECT14      |          |          | 0.000                 | 0.000           | --0.672 | 0.501    | 0.000                 | 0.000 | 0.586   | 0.558 |
| MATHP12                                                                                                                                             | EXPECT14      |          |          | --0.001               | 0.001           | --1.058 | 0.290    | 0.000                 | 0.001 | --0.292 | 0.770 |
| EFFORT12                                                                                                                                            | EXPECT14      |          |          | 0.000                 | 0.000           | --0.834 | 0.404    | 0.000                 | 0.000 | 0.642   | 0.521 |
| READP68                                                                                                                                             | PEER1012      |          |          | 0.000                 | 0.000           | 0.814   | 0.416    | --0.001               | 0.000 | --1.129 | 0.259 |
| MATHP68                                                                                                                                             | PEER1012      |          |          | 0.000                 | 0.000           | --0.643 | 0.520    | 0.000                 | 0.000 | --0.801 | 0.423 |
| READP68                                                                                                                                             | COGN1012      |          |          | 0.000                 | 0.001           | --0.006 | 0.995    | --0.001               | 0.001 | --0.880 | 0.379 |
| MATHP68                                                                                                                                             | COGN1012      |          |          | --0.002               | 0.001           | --1.385 | 0.166    | --0.001               | 0.001 | --0.938 | 0.348 |
| READP68                                                                                                                                             | EMOT1012      |          |          | 0.000                 | 0.000           | 0.137   | 0.891    | 0.000                 | 0.000 | --0.685 | 0.493 |
| MATHP68                                                                                                                                             | EMOT1012      |          |          | 0.000                 | 0.000           | 0.132   | 0.895    | 0.000                 | 0.000 | --0.435 | 0.664 |
| READP68                                                                                                                                             | EXTERN12      |          |          | --0.001               | 0.001           | --1.241 | 0.215    | 0.000                 | 0.001 | --0.125 | 0.901 |
| MATHP68                                                                                                                                             | EXTERN12      |          |          | 0.000                 | 0.001           | --0.077 | 0.939    | 0.000                 | 0.001 | --0.813 | 0.416 |
| PEER1012                                                                                                                                            | EXTERN12      |          |          | 0.000                 | 0.000           | --0.870 | 0.384    | 0.000                 | 0.000 | --0.377 | 0.706 |
| READP68                                                                                                                                             | READP12       |          |          | --0.007               | 0.004           | --1.806 | 0.071    | --0.002               | 0.002 | --1.192 | 0.233 |
| MATHP68                                                                                                                                             | READP12       |          |          | --0.002               | 0.001           | --1.639 | 0.101    | 0.000                 | 0.000 | --0.881 | 0.378 |
| PEER1012                                                                                                                                            | READP12       |          |          | --0.001               | 0.001           | --1.224 | 0.221    | 0.000                 | 0.000 | --0.868 | 0.385 |
| READP68                                                                                                                                             | MATHP12       |          |          | --0.004               | 0.002           | --2.196 | 0.028    | --0.002               | 0.002 | --1.588 | 0.112 |
| MATHP68                                                                                                                                             | MATHP12       |          |          | --0.006               | 0.003           | --2.193 | 0.028    | --0.003               | 0.002 | --1.277 | 0.202 |
| PEER1012                                                                                                                                            | MATHP12       |          |          | --0.002               | 0.001           | --1.401 | 0.161    | --0.001               | 0.001 | --0.986 | 0.324 |
| READP68                                                                                                                                             | EFFORT12      |          |          | 0.000                 | 0.000           | --0.617 | 0.537    | 0.000                 | 0.000 | --1.046 | 0.296 |
| MATHP68                                                                                                                                             | EFFORT12      |          |          | 0.000                 | 0.000           | --0.313 | 0.754    | 0.000                 | 0.000 | --0.442 | 0.658 |
| PEER1012                                                                                                                                            | EFFORT12      |          |          | 0.000                 | 0.000           | --0.165 | 0.869    | 0.000                 | 0.000 | --0.091 | 0.927 |
| READP68                                                                                                                                             | REPGR1417     |          |          | --0.002               | 0.002           | --1.110 | 0.267    | --0.002               | 0.001 | --1.101 | 0.271 |
| MATHP68                                                                                                                                             | REPGR1417     |          |          | 0.001                 | 0.002           | 0.564   | 0.573    | 0.000                 | 0.001 | 0.153   | 0.878 |
| PEER1012                                                                                                                                            | REPGR1417     |          |          | --0.002               | 0.002           | --1.116 | 0.264    | 0.000                 | 0.000 | 0.073   | 0.942 |
| EXTERN12                                                                                                                                            | REPGR1417     |          |          | --0.007               | 0.005           | --1.269 | 0.205    | --0.008               | 0.004 | --1.839 | 0.066 |
| READP12                                                                                                                                             | REPGR1417     |          |          | 0.000                 | 0.001           | 0.437   | 0.662    | 0.001                 | 0.001 | 0.848   | 0.397 |
| MATHP12                                                                                                                                             | REPGR1417     |          |          | --0.001               | 0.001           | --1.043 | 0.297    | 0.000                 | 0.002 | --0.291 | 0.771 |
| EFFORT12                                                                                                                                            | REPGR1417     |          |          | 0.001                 | 0.001           | 0.999   | 0.318    | 0.000                 | 0.001 | 0.291   | 0.771 |

Online Appendix Table A1.3: [Continued] Detailed Results from Path Analysis of Indirect Pathways between Externalizing Problems at Ages 4 to 5 and Years of Schooling among NLSY-C Children Born 1983 to 1986, by Gender

|                                                                                                                                                |          |           |   | Males (N=780) |       |          |                        | Females (N=881) |       |          |                        |
|------------------------------------------------------------------------------------------------------------------------------------------------|----------|-----------|---|---------------|-------|----------|------------------------|-----------------|-------|----------|------------------------|
|                                                                                                                                                |          |           |   | $\beta$       | SE    | T--Value | P---Value <sup>1</sup> | $\beta$         | SE    | T--Value | P---Value <sup>1</sup> |
| <i>Third-Order Indirect Paths (A---C) between Externalizing Problems at Ages 4 to 5 and Years of Schooling (i.e., Highest Grade Completed)</i> |          |           |   |               |       |          |                        |                 |       |          |                        |
| A                                                                                                                                              | B        | C         | D |               |       |          |                        |                 |       |          |                        |
| READP68                                                                                                                                        | PEER1012 | EXPECT14  |   | 0.000         | 0.000 | 0.534    | 0.593                  | 0.000           | 0.000 | 0.862    | 0.389                  |
| MATHP68                                                                                                                                        | PEER1012 | EXPECT14  |   | 0.000         | 0.000 | --0.465  | 0.642                  | 0.000           | 0.000 | 0.666    | 0.505                  |
| READP68                                                                                                                                        | EXTERN12 | EXPECT14  |   | 0.000         | 0.000 | --1.106  | 0.269                  | 0.000           | 0.000 | --0.125  | 0.901                  |
| MATHP68                                                                                                                                        | EXTERN12 | EXPECT14  |   | 0.000         | 0.000 | --0.076  | 0.939                  | 0.000           | 0.000 | --0.808  | 0.419                  |
| PEER1012                                                                                                                                       | EXTERN12 | EXPECT14  |   | 0.000         | 0.000 | --0.808  | 0.419                  | 0.000           | 0.000 | --0.387  | 0.699                  |
| READP68                                                                                                                                        | READP12  | EXPECT14  |   | 0.000         | 0.000 | --0.702  | 0.483                  | 0.000           | 0.000 | 0.649    | 0.517                  |
| MATHP68                                                                                                                                        | READP12  | EXPECT14  |   | 0.000         | 0.000 | --0.679  | 0.497                  | 0.000           | 0.000 | 0.572    | 0.568                  |
| PEER1012                                                                                                                                       | READP12  | EXPECT14  |   | 0.000         | 0.000 | --0.646  | 0.519                  | 0.000           | 0.000 | 0.568    | 0.570                  |
| READP68                                                                                                                                        | MATHP12  | EXPECT14  |   | 0.000         | 0.000 | --1.267  | 0.205                  | 0.000           | 0.000 | --1.363  | 0.173                  |
| MATHP68                                                                                                                                        | MATHP12  | EXPECT14  |   | 0.000         | 0.000 | --1.272  | 0.203                  | 0.000           | 0.000 | --1.189  | 0.234                  |
| PEER1012                                                                                                                                       | MATHP12  | EXPECT14  |   | 0.000         | 0.000 | --1.063  | 0.288                  | 0.000           | 0.000 | --0.970  | 0.332                  |
| READP68                                                                                                                                        | EFFORT12 | EXPECT14  |   | 0.000         | 0.000 | 0.594    | 0.553                  | 0.000           | 0.000 | 0.736    | 0.462                  |
| MATHP68                                                                                                                                        | EFFORT12 | EXPECT14  |   | 0.000         | 0.000 | 0.323    | 0.747                  | 0.000           | 0.000 | 0.418    | 0.676                  |
| PEER1012                                                                                                                                       | EFFORT12 | EXPECT14  |   | 0.000         | 0.000 | 0.161    | 0.872                  | 0.000           | 0.000 | 0.091    | 0.927                  |
| READP68                                                                                                                                        | PEER1012 | EXTERN12  |   | 0.000         | 0.000 | 0.769    | 0.442                  | 0.000           | 0.000 | --0.413  | 0.679                  |
| MATHP68                                                                                                                                        | PEER1012 | EXTERN12  |   | 0.000         | 0.000 | --0.598  | 0.550                  | 0.000           | 0.000 | --0.365  | 0.715                  |
| READP68                                                                                                                                        | COGN1012 | EXTERN12  |   | 0.000         | 0.000 | 0.006    | 0.995                  | 0.000           | 0.000 | --0.430  | 0.667                  |
| MATHP68                                                                                                                                        | COGN1012 | EXTERN12  |   | 0.000         | 0.000 | 0.521    | 0.602                  | 0.000           | 0.000 | --0.440  | 0.660                  |
| READP68                                                                                                                                        | EMOT1012 | EXTERN12  |   | 0.000         | 0.000 | 0.404    | 0.686                  | 0.000           | 0.000 | --0.266  | 0.790                  |
| MATHP68                                                                                                                                        | EMOT1012 | EXTERN12  |   | 0.000         | 0.000 | 0.246    | 0.806                  | 0.000           | 0.000 | --0.230  | 0.818                  |
| READP68                                                                                                                                        | PEER1012 | READP12   |   | 0.000         | 0.000 | 0.989    | 0.322                  | 0.000           | 0.000 | --1.004  | 0.315                  |
| MATHP68                                                                                                                                        | PEER1012 | READP12   |   | 0.000         | 0.000 | --0.700  | 0.484                  | 0.000           | 0.000 | --0.775  | 0.438                  |
| READP68                                                                                                                                        | COGN1012 | READP12   |   | 0.000         | 0.000 | --0.006  | 0.995                  | 0.000           | 0.000 | --0.595  | 0.552                  |
| MATHP68                                                                                                                                        | COGN1012 | READP12   |   | 0.000         | 0.000 | --1.126  | 0.260                  | 0.000           | 0.000 | --0.666  | 0.505                  |
| READP68                                                                                                                                        | EMOT1012 | READP12   |   | 0.000         | 0.000 | 0.361    | 0.718                  | 0.000           | 0.000 | 0.607    | 0.544                  |
| MATHP68                                                                                                                                        | EMOT1012 | READP12   |   | 0.000         | 0.000 | 0.222    | 0.824                  | 0.000           | 0.000 | 0.442    | 0.658                  |
| READP68                                                                                                                                        | PEER1012 | MATHP12   |   | 0.000         | 0.000 | 1.106    | 0.269                  | 0.000           | 0.000 | --1.294  | 0.196                  |
| MATHP68                                                                                                                                        | PEER1012 | MATHP12   |   | 0.000         | 0.000 | --0.778  | 0.436                  | 0.000           | 0.000 | --0.857  | 0.392                  |
| READP68                                                                                                                                        | COGN1012 | MATHP12   |   | 0.000         | 0.000 | --0.006  | 0.995                  | 0.000           | 0.000 | --0.707  | 0.480                  |
| MATHP68                                                                                                                                        | COGN1012 | MATHP12   |   | 0.000         | 0.000 | --0.157  | 0.876                  | 0.000           | 0.000 | --0.823  | 0.410                  |
| READP68                                                                                                                                        | EMOT1012 | MATHP12   |   | 0.000         | 0.000 | --0.342  | 0.732                  | 0.000           | 0.000 | 0.623    | 0.533                  |
| MATHP68                                                                                                                                        | EMOT1012 | MATHP12   |   | 0.000         | 0.000 | --0.216  | 0.829                  | 0.000           | 0.000 | 0.445    | 0.657                  |
| READP68                                                                                                                                        | PEER1012 | EFFORT12  |   | 0.000         | 0.000 | 0.161    | 0.872                  | 0.000           | 0.000 | --0.091  | 0.928                  |
| MATHP68                                                                                                                                        | PEER1012 | EFFORT12  |   | 0.000         | 0.000 | --0.161  | 0.872                  | 0.000           | 0.000 | --0.091  | 0.928                  |
| READP68                                                                                                                                        | PEER1012 | REPGR1417 |   | 0.000         | 0.000 | 1.006    | 0.314                  | 0.000           | 0.000 | 0.074    | 0.941                  |
| MATHP68                                                                                                                                        | PEER1012 | REPGR1417 |   | 0.000         | 0.000 | --0.676  | 0.499                  | 0.000           | 0.000 | 0.073    | 0.942                  |
| READP68                                                                                                                                        | COGN1012 | REPGR1417 |   | 0.000         | 0.000 | --0.006  | 0.995                  | 0.000           | 0.000 | --0.145  | 0.884                  |
| MATHP68                                                                                                                                        | COGN1012 | REPGR1417 |   | --0.001       | 0.000 | --1.377  | 0.168                  | 0.000           | 0.000 | --0.148  | 0.882                  |
| READP68                                                                                                                                        | EMOT1012 | REPGR1417 |   | 0.000         | 0.000 | 0.392    | 0.695                  | 0.000           | 0.000 | 0.681    | 0.496                  |
| MATHP68                                                                                                                                        | EMOT1012 | REPGR1417 |   | 0.000         | 0.000 | 0.246    | 0.806                  | 0.000           | 0.000 | 0.449    | 0.653                  |
| READP68                                                                                                                                        | EXTERN12 | REPGR1417 |   | 0.000         | 0.000 | --0.901  | 0.368                  | 0.000           | 0.000 | --0.123  | 0.902                  |
| MATHP68                                                                                                                                        | EXTERN12 | REPGR1417 |   | 0.000         | 0.000 | --0.077  | 0.939                  | 0.000           | 0.000 | --0.814  | 0.415                  |
| PEER1012                                                                                                                                       | EXTERN12 | REPGR1417 |   | 0.000         | 0.000 | --0.735  | 0.462                  | 0.000           | 0.000 | --0.371  | 0.711                  |
| READP68                                                                                                                                        | READP12  | REPGR1417 |   | 0.000         | 0.001 | 0.455    | 0.649                  | 0.001           | 0.000 | 1.121    | 0.262                  |
| MATHP68                                                                                                                                        | READP12  | REPGR1417 |   | 0.000         | 0.000 | 0.452    | 0.651                  | 0.000           | 0.000 | 0.865    | 0.387                  |
| PEER1012                                                                                                                                       | READP12  | REPGR1417 |   | 0.000         | 0.000 | 0.436    | 0.663                  | 0.000           | 0.000 | 0.815    | 0.415                  |
| READP68                                                                                                                                        | MATHP12  | REPGR1417 |   | --0.001       | 0.000 | --1.240  | 0.215                  | --0.001         | 0.000 | --1.462  | 0.144                  |
| MATHP68                                                                                                                                        | MATHP12  | REPGR1417 |   | --0.001       | 0.001 | --1.216  | 0.224                  | --0.001         | 0.001 | --1.233  | 0.218                  |
| PEER1012                                                                                                                                       | MATHP12  | REPGR1417 |   | 0.000         | 0.000 | --1.060  | 0.289                  | 0.000           | 0.000 | --0.981  | 0.327                  |
| READP68                                                                                                                                        | EFFORT12 | REPGR1417 |   | 0.000         | 0.000 | --0.579  | 0.563                  | 0.000           | 0.000 | 0.312    | 0.755                  |
| MATHP68                                                                                                                                        | EFFORT12 | REPGR1417 |   | 0.000         | 0.000 | --0.352  | 0.725                  | 0.000           | 0.000 | 0.298    | 0.766                  |
| PEER1012                                                                                                                                       | EFFORT12 | REPGR1417 |   | 0.000         | 0.000 | --0.158  | 0.875                  | 0.000           | 0.000 | 0.093    | 0.926                  |

Online Appendix Table A1.3: [Continued] Detailed Results from Path Analysis of Indirect Pathways between Externalizing Problems at Ages 4 to 5 and Years of Schooling among NLSY-C Children Born 1983 to 1986, by Gender

|                                                                                                                                               |          |          |           | Males (N=780) |       |         |                      | Females (N=881) |       |         |                      |
|-----------------------------------------------------------------------------------------------------------------------------------------------|----------|----------|-----------|---------------|-------|---------|----------------------|-----------------|-------|---------|----------------------|
|                                                                                                                                               |          |          |           | $\beta$       | SE    | T-Value | P-Value <sup>1</sup> | $\beta$         | SE    | T-Value | P-Value <sup>1</sup> |
| <i>Fourth-Order Indirect Paths (A-D) between Externalizing Problems at Ages 4 to 5 and Years of Schooling (i.e., Highest Grade Completed)</i> |          |          |           |               |       |         |                      |                 |       |         |                      |
| A                                                                                                                                             | B        | C        | D         |               |       |         |                      |                 |       |         |                      |
| READP68                                                                                                                                       | PEER1012 | EXTERN12 | EXPECT14  | 0.000         | 0.000 | 0.749   | 0.454                | 0.000           | 0.000 | -0.422  | 0.673                |
| MATHP68                                                                                                                                       | PEER1012 | EXTERN12 | EXPECT14  | 0.000         | 0.000 | -0.587  | 0.558                | 0.000           | 0.000 | -0.370  | 0.711                |
| READP68                                                                                                                                       | COGN1012 | EXTERN12 | EXPECT14  | 0.000         | 0.000 | 0.006   | 0.995                | 0.000           | 0.000 | -0.414  | 0.679                |
| MATHP68                                                                                                                                       | COGN1012 | EXTERN12 | EXPECT14  | 0.000         | 0.000 | 0.492   | 0.623                | 0.000           | 0.000 | -0.423  | 0.672                |
| READP68                                                                                                                                       | EMOT1012 | EXTERN12 | EXPECT14  | 0.000         | 0.000 | 0.389   | 0.697                | 0.000           | 0.000 | -0.266  | 0.790                |
| MATHP68                                                                                                                                       | EMOT1012 | EXTERN12 | EXPECT14  | 0.000         | 0.000 | 0.241   | 0.809                | 0.000           | 0.000 | -0.230  | 0.818                |
| READP68                                                                                                                                       | PEER1012 | READP12  | EXPECT14  | 0.000         | 0.000 | 0.624   | 0.533                | 0.000           | 0.000 | 0.602   | 0.547                |
| MATHP68                                                                                                                                       | PEER1012 | READP12  | EXPECT14  | 0.000         | 0.000 | -0.533  | 0.594                | 0.000           | 0.000 | 0.570   | 0.569                |
| READP68                                                                                                                                       | COGN1012 | READP12  | EXPECT14  | 0.000         | 0.000 | -0.006  | 0.995                | 0.000           | 0.000 | 0.507   | 0.612                |
| MATHP68                                                                                                                                       | COGN1012 | READP12  | EXPECT14  | 0.000         | 0.000 | -0.608  | 0.543                | 0.000           | 0.000 | 0.564   | 0.573                |
| READP68                                                                                                                                       | EMOT1012 | READP12  | EXPECT14  | 0.000         | 0.000 | 0.306   | 0.760                | 0.000           | 0.000 | -0.465  | 0.642                |
| MATHP68                                                                                                                                       | EMOT1012 | READP12  | EXPECT14  | 0.000         | 0.000 | 0.204   | 0.838                | 0.000           | 0.000 | -0.378  | 0.706                |
| READP68                                                                                                                                       | PEER1012 | MATHP12  | EXPECT14  | 0.000         | 0.000 | 0.964   | 0.335                | 0.000           | 0.000 | -1.196  | 0.232                |
| MATHP68                                                                                                                                       | PEER1012 | MATHP12  | EXPECT14  | 0.000         | 0.000 | -0.703  | 0.482                | 0.000           | 0.000 | -0.849  | 0.396                |
| READP68                                                                                                                                       | COGN1012 | MATHP12  | EXPECT14  | 0.000         | 0.000 | -0.006  | 0.995                | 0.000           | 0.000 | -0.691  | 0.490                |
| MATHP68                                                                                                                                       | COGN1012 | MATHP12  | EXPECT14  | 0.000         | 0.000 | -0.155  | 0.876                | 0.000           | 0.000 | -0.802  | 0.422                |
| READP68                                                                                                                                       | EMOT1012 | MATHP12  | EXPECT14  | 0.000         | 0.000 | -0.336  | 0.737                | 0.000           | 0.000 | 0.611   | 0.541                |
| MATHP68                                                                                                                                       | EMOT1012 | MATHP12  | EXPECT14  | 0.000         | 0.000 | -0.215  | 0.830                | 0.000           | 0.000 | 0.445   | 0.657                |
| READP68                                                                                                                                       | PEER1012 | EFFORT12 | EXPECT14  | 0.000         | 0.000 | -0.158  | 0.875                | 0.000           | 0.000 | 0.091   | 0.927                |
| MATHP68                                                                                                                                       | PEER1012 | EFFORT12 | EXPECT14  | 0.000         | 0.000 | 0.157   | 0.875                | 0.000           | 0.000 | 0.091   | 0.927                |
| READP68                                                                                                                                       | PEER1012 | EXTERN12 | REPGR1417 | 0.000         | 0.000 | 0.667   | 0.505                | 0.000           | 0.000 | -0.406  | 0.685                |
| MATHP68                                                                                                                                       | PEER1012 | EXTERN12 | REPGR1417 | 0.000         | 0.000 | -0.543  | 0.587                | 0.000           | 0.000 | -0.360  | 0.719                |
| READP68                                                                                                                                       | COGN1012 | EXTERN12 | REPGR1417 | 0.000         | 0.000 | 0.006   | 0.995                | 0.000           | 0.000 | -0.417  | 0.677                |
| MATHP68                                                                                                                                       | COGN1012 | EXTERN12 | REPGR1417 | 0.000         | 0.000 | 0.486   | 0.627                | 0.000           | 0.000 | -0.425  | 0.671                |
| READP68                                                                                                                                       | EMOT1012 | EXTERN12 | REPGR1417 | 0.000         | 0.000 | 0.385   | 0.700                | 0.000           | 0.000 | -0.266  | 0.790                |
| MATHP68                                                                                                                                       | EMOT1012 | EXTERN12 | REPGR1417 | 0.000         | 0.000 | 0.239   | 0.811                | 0.000           | 0.000 | -0.229  | 0.819                |
| READP68                                                                                                                                       | PEER1012 | READP12  | REPGR1417 | 0.000         | 0.000 | -0.432  | 0.666                | 0.000           | 0.000 | 0.939   | 0.348                |
| MATHP68                                                                                                                                       | PEER1012 | READP12  | REPGR1417 | 0.000         | 0.000 | 0.395   | 0.693                | 0.000           | 0.000 | 0.758   | 0.448                |
| READP68                                                                                                                                       | COGN1012 | READP12  | REPGR1417 | 0.000         | 0.000 | 0.006   | 0.995                | 0.000           | 0.000 | 0.572   | 0.568                |
| MATHP68                                                                                                                                       | COGN1012 | READP12  | REPGR1417 | 0.000         | 0.000 | 0.431   | 0.667                | 0.000           | 0.000 | 0.661   | 0.509                |
| READP68                                                                                                                                       | EMOT1012 | READP12  | REPGR1417 | 0.000         | 0.000 | -0.300  | 0.764                | 0.000           | 0.000 | -0.609  | 0.543                |
| MATHP68                                                                                                                                       | EMOT1012 | READP12  | REPGR1417 | 0.000         | 0.000 | -0.198  | 0.843                | 0.000           | 0.000 | -0.435  | 0.663                |
| READP68                                                                                                                                       | PEER1012 | MATHP12  | REPGR1417 | 0.000         | 0.000 | 0.898   | 0.369                | 0.000           | 0.000 | -1.221  | 0.222                |
| MATHP68                                                                                                                                       | PEER1012 | MATHP12  | REPGR1417 | 0.000         | 0.000 | -0.658  | 0.510                | 0.000           | 0.000 | -0.825  | 0.409                |
| READP68                                                                                                                                       | COGN1012 | MATHP12  | REPGR1417 | 0.000         | 0.000 | -0.006  | 0.995                | 0.000           | 0.000 | -0.698  | 0.485                |
| MATHP68                                                                                                                                       | COGN1012 | MATHP12  | REPGR1417 | 0.000         | 0.000 | -0.157  | 0.875                | 0.000           | 0.000 | -0.810  | 0.418                |
| READP68                                                                                                                                       | EMOT1012 | MATHP12  | REPGR1417 | 0.000         | 0.000 | -0.334  | 0.738                | 0.000           | 0.000 | 0.597   | 0.550                |
| MATHP68                                                                                                                                       | EMOT1012 | MATHP12  | REPGR1417 | 0.000         | 0.000 | -0.215  | 0.830                | 0.000           | 0.000 | 0.451   | 0.652                |
| READP68                                                                                                                                       | PEER1012 | EFFORT12 | REPGR1417 | 0.000         | 0.000 | 0.155   | 0.877                | 0.000           | 0.000 | 0.093   | 0.926                |
| MATHP68                                                                                                                                       | PEER1012 | EFFORT12 | REPGR1417 | 0.000         | 0.000 | -0.154  | 0.877                | 0.000           | 0.000 | 0.093   | 0.926                |

Direct Path between Externalizing Problems at Ages 4-5 and Years of Schooling

|                 |  |                |
|-----------------|--|----------------|
| Chi-square (df) |  | 147.99 (30)*** |
| RMSEA           |  | 0.05           |
| CFI             |  | 0.974          |

\*\*\* p<0.001, \*\*p<0.01, \* p<0.05, + p<0.10. Estimates display the standardized total, total indirect, specific indirect, and direct effects (i.e., associations) between externalizing problems at ages 4 to 5 and years of schooling at ages 26 to 29.

<sup>1</sup> Note that the total effect (T) is less than the total indirect effect (I) because the net direct effect (D) between externalizing problems at age 4 to 5 and years of schooling becomes positive (although non-statistically significantly from 0) for both genders after controlling for all proximate mediating factors. For example, since T=D+I,  $D_{females} = 0.035$ ,  $T_{females} = -0.101 + 0.035 = -0.066$ .

Source: The 1983 to 1986 birth cohorts of the Children of the National Longitudinal Survey of Youth:1979 (NLSY-C; <https://www.nlsinfo.org/content/cohorts/nlsy79-children>) and matched National Longitudinal Survey of Youth:1979 (mother sample). The low-income white and military oversamples are excluded.

Note: The National Longitudinal Survey of Youth-Child Supplement (NLSY-C) consists of a nationally representative sample of children born to women age 14 to 21 in 1979; after excluding the poor white and military oversamples, the working sample in this study is restricted to the 1,857 children born 1983 to 1986, whose mothers were 18 to 29 years at birth. Children born 1983 to 1986 were born early enough to be age 26 to 29 as of the 2012 follow-up survey, but late enough to have early behavior problems information measured at age 4 to 5 beginning in 1986, at which point these items were introduced for children age 4 to 16. I used multiple imputation of 20 datasets to handle item-missingness. Model estimates use inverse-probability weighting to deal with stratified sample design (minority oversampling) and sample attrition by the 2012 follow-up wave (weights are described at: <https://www.nlsinfo.org/weights/nlsy79>). Once inverse-probability survey weights are applied, the working sample with complete attainment and behavior information drops from 1,857 to 1,661 children (881 girls, 780 boys).



Online Appendix Table A2.1: Detailed Results for Two-Way Decomposition of Gender Differences in Levels and Effects of Externalizing Problems and Family Factors on Years of Schooling at Age 19 to 22 for NLSY-C Children Born 1983 to 1993 (Reference: Boys)

|                                                                                                                                                                    | Means        |              | Means Diff    |                   | OLS Regression Coefficients |          | Contribution of Diff. in Levels | Contribution of Diff. in Coefficients | Total Contribution of Levels & Coefficients | Prop. of Positive Effects on Gap | Prop. of Negative Effects on Gap |
|--------------------------------------------------------------------------------------------------------------------------------------------------------------------|--------------|--------------|---------------|-------------------|-----------------------------|----------|---------------------------------|---------------------------------------|---------------------------------------------|----------------------------------|----------------------------------|
|                                                                                                                                                                    | (1)<br>F     | (2)<br>M     | (3)<br>F-M    | (4)<br>F          | (5)<br>Sig                  | (5)<br>M | (6)<br>Sig                      | (7)                                   | (8)                                         | (9)                              | (10)                             |
| Birth Order                                                                                                                                                        | 1.983        | 1.992        | -0.009        | -0.003            | -0.252 **                   |          | 0.002                           | 0.496                                 | 0.498                                       | 0.230                            | 0.000                            |
| Mother Years of Schooling at Birth                                                                                                                                 | 12.852       | 12.722       | 0.130         | 0.272 ***         | 0.261 ***                   |          | 0.034                           | 0.140                                 | 0.174                                       | 0.080                            | 0.000                            |
| <b>Externalizing Problems, Ages 4-5</b>                                                                                                                            | <b>1.800</b> | <b>2.336</b> | <b>-0.536</b> | <b>-0.101 ***</b> | <b>-0.112 ***</b>           |          | <b>0.060</b>                    | <b>0.026</b>                          | <b>0.086</b>                                | <b>0.039</b>                     | 0.000                            |
| African-American                                                                                                                                                   | 0.148        | 0.136        | 0.012         | 0.260             | -0.120                      |          | -0.001                          | 0.052                                 | 0.050                                       | 0.023                            | 0.000                            |
| Home Environment, Ages 3-5                                                                                                                                         | -0.171       | -0.142       | -0.029        | -0.467 **         | -0.164                      |          | 0.005                           | 0.043                                 | 0.048                                       | 0.022                            | 0.000                            |
| Child Std. Score on PPVT, Ages 3-4                                                                                                                                 | 0.393        | 0.273        | 0.120         | 0.323 ***         | 0.343 ***                   |          | 0.041                           | -0.005                                | 0.036                                       | 0.016                            | 0.000                            |
| Low Birth Weight                                                                                                                                                   | 0.075        | 0.056        | 0.019         | 0.065             | -0.293                      |          | -0.006                          | 0.020                                 | 0.014                                       | 0.007                            | 0.000                            |
| Hispanic                                                                                                                                                           | 0.069        | 0.075        | -0.006        | 0.099             | -0.002                      |          | 0.000                           | 0.008                                 | 0.008                                       | 0.003                            | 0.000                            |
| Received Care Outside Home, Ages 4-5                                                                                                                               | 0.536        | 0.513        | 0.023         | -0.155            | -0.088                      |          | -0.002                          | -0.034                                | -0.036                                      | 0.000                            | 0.022                            |
| Mother Age at Birth                                                                                                                                                | 26.787       | 26.807       | -0.020        | -0.072 **         | -0.021                      |          | 0.000                           | -1.367                                | -1.367                                      | 0.000                            | 0.839                            |
| Number of Children in Family, Ages 4-5                                                                                                                             | 2.620        | 2.628        | -0.008        | -0.091            | -0.017                      |          | 0.000                           | -0.194                                | -0.194                                      | 0.000                            | 0.119                            |
| Father Absent at Child's Birth                                                                                                                                     | 0.172        | 0.153        | 0.019         | -0.470 **         | -0.298 *                    |          | -0.006                          | -0.026                                | -0.032                                      | 0.000                            | 0.020                            |
| Household Income in \$2011, Child Ages 4-5                                                                                                                         | 10.067       | 9.203        | 0.864         | 0.002             | -0.008                      |          | -0.007                          | 0.092                                 | 0.085                                       | 0.039                            | 0.000                            |
| Constant                                                                                                                                                           | 1.000        | 1.000        | 0.000         | 12.285 ***        | 1.113 ***                   |          | 0.000                           | 1.172                                 | 1.172                                       | 0.540                            | 0.000                            |
| Observations (N)                                                                                                                                                   | 2104         | 2074         |               | 2104              | 2074                        |          |                                 |                                       |                                             |                                  |                                  |
| Overall Contribution of Early Externalizing Problems, Early Childhood Factors, and Controls to the Gender Gap in Years of Schooling:                               |              |              |               |                   |                             |          | 0.121                           | 0.420                                 | 0.541                                       | 1.000                            | 1.000                            |
| Overall Contribution of Early Externalizing Problems, Early Childhood Factors, and Controls to the Gender Gap as a Proportion of Gap Driven by Levels vs. Effects: |              |              |               |                   |                             |          | 0.224                           | 0.776                                 | 1.000                                       |                                  |                                  |

\*\*\* p<0.001, \*\*p<0.01, \* p<0.05, + p<0.10 (two-tailed t-tests for a statistically significant difference from 0). This model uses boys' coefficients as the reference when calculating each variable's contribution to the gap in schooling due to gender differences in mean levels and boys' means as the reference when calculating each variable's contribution due to gender differences in coefficients (i.e., effects).

Source: The 1983 to 1993 birth cohorts of the Children of the National Longitudinal Survey of Youth:1979 (NLSY-C; <https://www.nlsinfo.org/content/cohorts/nlsy79-children>) and matched National Longitudinal Survey of Youth:1979 (mother sample). The low-income white and military oversamples are excluded.

Note: The National Longitudinal Survey of Youth-Child Supplement (NLSY-C) consists of a nationally representative sample of children born to women age 14 to 21 in 1979; after excluding the poor white and military oversamples, the working sample in this study is restricted to the 1,857 children born 1983 to 1986, whose mothers were 18 to 29 years at birth. Children born 1983 to 1986 were born early enough to be age 26 to 29 as of the 2012 follow-up survey, but late enough to have early behavior problems information measured at age 4 to 5 beginning in 1986, at which point these items were introduced for children age 4 to 16. I used multiple imputation of 20 datasets to handle item-missingness. Model estimates use inverse-probability weighting to deal with stratified sample design (minority oversampling) and sample attrition by the 2012 follow-up wave (weights are described at: <https://www.nlsinfo.org/weights/nlsy79>). Once inverse-probability survey weights are applied, the working sample with complete attainment and behavior information drops from 1,857 to 1,661 children (881 girls, 780 boys).
